# Supplementary material
Source: PubMed Central journal article supplement (PMC4944219)
Supplement: JB.00353-16_zjb999094118so1.pdf [file JB.00353-16_zjb999094118so1.pdf]

**SUPPLEMENTAL MATERIALS FOR:**

**A type I signal peptidase is required for pilus assembly in the Gram-positive biofilm-forming bacterium *Actinomyces oris***

**Sara D. Siegel,<sup>1</sup> Chenggang Wu,<sup>1‡</sup> and Hung Ton-That<sup>1‡</sup>**

<sup>1</sup>*Department of Microbiology & Molecular Genetics, University of Texas Health Science Center, Houston, TX, USA.*

‡To whom correspondence should be addressed:

Chenggang Wu

Department of Microbiology and Molecular Genetics

University of Texas Health Science Center

6431 Fannin Street, R222/MSE

Houston, TX 77030, USA.

E-mail: [chenggang.wu@uth.tmc.edu](mailto:chenggang.wu@uth.tmc.edu);

Hung Ton-That

Department of Microbiology and Molecular Genetics

University of Texas Health Science Center

6431 Fannin Street, R224/MSE

Houston, TX 77030, USA.

E-mail: [ton-that.hung@uth.tmc.edu](mailto:ton-that.hung@uth.tmc.edu);

Tel. (+1) 713 500 5468; Fax (+1) 713 500 5499.

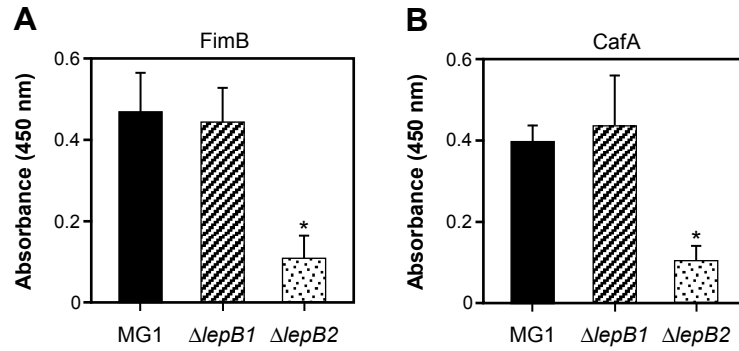

**Figure S1: Requirement of LepB2 for surface expression of tip pilins**

The presence of FimB (**A**) and CafA (**B**) on the bacterial cell surface was analyzed by ELISA with specific antibodies to FimB and CafA, respectively. The absorbance values, as compared to those of corresponding mutants as background, were determined from at least two independent experiments performed in triplicate. Error bars represent standard deviations. Asterisks (\*) indicate P values of 0.02 (A) and 0.03 (B); all determined using the paired, two-tailed t-test with Prism GraphPad.



**Table S1: Bacterial strains and plasmids used in this study**

| Strain & Plasmid       | Description                                                                                 | Reference  |
|------------------------|---------------------------------------------------------------------------------------------|------------|
| <i>Strain</i>          |                                                                                             |            |
| <i>A. oris</i> MG1     | Parental strain                                                                             | (2)        |
| <i>A. oris</i> CW1     | $\Delta galK$ ; an isogenic derivative of MG-1                                              | (3)        |
| <i>A. oris</i> AR4     | $\Delta fimA$ ; an isogenic derivative of CW1                                               | (3)        |
| <i>A. oris</i> WU36    | Conditional <i>srtA</i> deletion mutant ( $\Delta srtA$ ), containing pTetR- $\Omega$ -SrtA | (4)        |
| <i>A. oris</i> WU51    | Deletion of <i>1291</i> ( $\Delta gspA$ ); an isogenic derivative of CW1                    | (4)        |
| <i>A. oris</i> WU73    | Deletion of <i>gspA</i> and <i>srtA</i> ; $\Delta GspA/\Delta srtA$                         | (4)        |
| <i>A. oris</i> WU42    | $\Delta lepB2$ ; an isogenic derivative of MG1                                              | This study |
| <i>A. oris</i> WU50    | $\Delta lepB1$ ; an isogenic derivative of MG1                                              | This study |
| <i>A. oris</i> WU80    | $\Delta lepB1/2$ ; an isogenic derivative of MG1                                            | This study |
| <i>A. oris</i> WU81    | Deletion of <i>lepB2</i> and <i>srtA</i> ; $\Delta lepB2/\Delta srtA$                       | This study |
| <i>A. oris</i> WU42c1  | WU42 containing pLepB2                                                                      | This study |
| <i>A. oris</i> WU42c2  | WU42 containing pLepB2(S101A)                                                               | This study |
| <i>A. oris</i> WU42c3  | WU42 containing pLepB2(K169A)                                                               | This study |
| <i>A. oris</i> WU51c1  | WU51 containing pGspA $_{\Delta cwss}$                                                      | This study |
| <i>S. oralis</i> So34  | RPS positive                                                                                | (5)        |
| <i>S. oralis</i> OC1   | a RPS-negative isogenic mutant of So34                                                      | (5)        |
| <i>Plasmid</i>         |                                                                                             |            |
| pJRD215                | <i>Actinomyces/E. coli</i> shuttle vector, Kan <sup>R</sup> , Str <sup>R</sup>              | (6)        |
| pGspA $_{\Delta cwss}$ | pCWU10 expressing GspA lacking the cell wall sorting signal (CWS)                           | This study |
| pCWU2                  | Derivative of pHTT177, expressing GalK under the control of the <i>rpsJ</i> promoter        | (3)        |
| pCWU2- $\Delta lepB2$  | An allelic replacement vector of <i>Ana_1190</i> ( <i>lepB2</i> ) using pCWU2               | This study |
| pCWU2- $\Delta lepB1$  | An allelic replacement vector of <i>Ana_1180</i> ( <i>lepB1</i> ) using pCWU2               | This study |
| pLepB2                 | pJRD215 derivative expressing wild-type LepB2 from MG-1                                     | This study |
| pLepB2(S101A)          | pJRD215 derivative expressing LepB2 with S101A mutation                                     | This study |

|                        |                                                                                                                       |            |
|------------------------|-----------------------------------------------------------------------------------------------------------------------|------------|
| pLepB2(K169A)          | pJRD215 derivative expressing LepB2 with K169A mutation                                                               | This study |
| pCVD047                | Broad host range vector                                                                                               | (7)        |
| pCWU10                 | pCVD047 derivative with kanamycin resistance gene from pJRD215 replacing with its original ampicillin resistance gene | This study |
| pFimA <sub>ΔCWSS</sub> | pCWU10 expressing FimA lacking the cell wall sorting signal (CWSS)                                                    | This study |

---

**Table S2: Primers used in this study**

| Primer                             | Sequence <sup>(a)</sup>                                             | Application           |
|------------------------------------|---------------------------------------------------------------------|-----------------------|
| 1190upF                            | GGCGTCTAGATCCGGACAAACCGTTCCATG CCCC GA                              | pCWU2- $\Delta$ lepB2 |
| 1190upR                            | GGCGAAGCTTTGCGCTGCTCATAGGCCTTC TCCTG                                | pCWU2- $\Delta$ lepB2 |
| 1190dnF                            | GGCGAAGCTTGACTGATCGCCCCGAAAGCG TGCTG                                | pCWU2- $\Delta$ lepB2 |
| 1190dnR                            | GGCGGAATTCACCGACCTCGTCCAGGCCGC<br>CGACGT                            | pCWU2- $\Delta$ lepB2 |
| Pro-1192F                          | GGCGGAATTC <sup>(a)</sup> CCCTCGGCCGAGTCATCGGCC<br>GCTCG            | pLepB2                |
| pro-1192R                          | GGCGGGTACCCTCCTGGGATCGGGGCATGGAACGG                                 | pLepB2                |
| com-1190F                          | GGCGGGTACCGTGATGAGCAGCGCACCCGACCA<br>GAGC                           | pLepB2                |
| com-1190R                          | GGCGAAGCTTTCAGTGGTGGTGGTGGTGGT<br>GGTCCCCG GAGCCCGCCA GCCTG         | pLepB2                |
| 1188upF                            | GGCGGAATTCACTGATCGCCCCGAAAGCGT GCTGG                                | pCWU2- $\Delta$ lepB1 |
| 1188upR                            | GGCGTCTAGAACGGGGAAGTGCAGGCCGGT GTG                                  | pCWU2- $\Delta$ lepB1 |
| 1188dnF                            | GGCGTCTAGAGGCCCGGACACTTACGGCGG CATGG                                | pCWU2- $\Delta$ lepB1 |
| 1188dnR                            | GGCGGGTACCCTAGCCCCATGACGCATCCA CCG                                  | pCWU2- $\Delta$ lepB1 |
| 1190S102A-F                        | GCGATGGAGAACACCTCAACGAGGGCG                                         | pLepB2(S101A)         |
| 1190S102A-R                        | CCCCGAGATGGTGAAGCTGCTCTGGATG                                        | pLepB2(S101A)         |
| 1190K169A-F                        | GCGCGGGTCATCGGAATGCCCGGTGACCACG                                     | pLepB2(K169A)         |
| 1190K169A-R                        | GATGAGGTGGTGACCGGCGTTCTGGGG                                         | pLepB2(K169A)         |
| pCVD047-<br>noAmp-F                | GGCGGAGTCATGATTTAGAAAAATAAACAAATAGGG<br>G                           | pCVD047 $\Delta$ Amp  |
| pCVD047-<br>noAmp-R                | GGCGAAGCTTCTGTCAGACCAAGTTACTCATATATA                                | pCVD047 $\Delta$ Amp  |
| 215Kan <sub>MCS</sub> -F           | GGCGGAGCTCTCAGAAGA <sup>(a)</sup> ACTCGTCAAGAA GGCGA                | pCWU10                |
| 215Kan <sub>MCS</sub> -R           | GGCGAAGCTTATCG ATGATAAGCTGTCAA                                      | pCWU10                |
| GspA $\Delta$ cws-His6-<br>R       | GGCGGAATTCAGTGGTGGTGGTGGTGGTGGGGC<br>TTGCCGGAGGTGGAGGCCGCC          | pGspA $\Delta$ cwss   |
| prFimB-BamHI-F                     | AAAAAGGATCCGACGTCACCGGTGTCATCACCCCTCC                               | pFimA $\Delta$ cwss   |
| prFimB-R                           | GGGACCGCCTTCTCTTAGGCGTCG                                            | pFimA $\Delta$ cwss   |
| FimA-F                             | GTGACGCCGTCGGACAAGACGGAG                                            | pFimA $\Delta$ cwss   |
| FimA $\Delta$ cws-His6-<br>EcoRI-R | AAAAAGAATTCAGTGGTGGTGGTGGTGGTGAAC<br>CGA CTG CTT GGT GTT CTC AAC GG | pFimA $\Delta$ cwss   |
| RT-16s-R                           | GGTGTTGCCGACTTTTCATG                                                | RT- PCR (16s rRNA)    |

|          |                            |                        |
|----------|----------------------------|------------------------|
| RT-16s-F | GTCGCTAGTAATCGCAGATCAG     | RT- PCR (16s rRNA)     |
| RT-1291F | GACGGCACCTACAAGATCAC       | RT-PCR ( <i>gspA</i> ) |
| RT-1291R | AGGAGTCGGTCTTGCTGA         | RT-PCR ( <i>gspA</i> ) |
| P1       | CCTCCAGGTCC CGATCACAC      | RT and qRT-PCR         |
| P2       | GCCTGCGGGGTTGGATAGAGG      | RT and qRT-PCR         |
| P3       | CCCGGCCGGTCAGCCTCCGAGGTCCG | RT and qRT-PCR         |
| P4       | GCTGGACCAGTGGGAGTATGGCCAC  | RT and qRT-PCR         |
| P5       | GTGTGATCGCGGACCTGGAGG      | RT- PCR                |
| P6       | GGCCATACTCCCACTGGTCCAG     | RT- PCR                |

---

<sup>(a)</sup> Underlined are the restriction sites in the primers.

**Table S3: Putative signal peptides of non-fimbrial and fimbrial surface proteins in *Actinomyces oris***

| Surface Protein | Signal Peptide <sup>a</sup>                                                                                                                |
|-----------------|--------------------------------------------------------------------------------------------------------------------------------------------|
| AcaA            | MSIIP IRLRRLSAPTSALLAALALAAAGP <b><u>AVA</u></b> APASNT                                                                                    |
| AcaB            | MKRRIVAQMAILALSLSAPVLAVTHAPQ <b><u>AAA</u></b> ADGNI I                                                                                     |
| AcaC/GspA       | MRLGRPLAAASVMAAAIGASLAASP <b><u>ALAG</u></b> DDSLAF                                                                                        |
| AcaD            | MRLGRPLAAASAVAAMT <b><u>GASLI</u></b> ASP <b><u>VL</u></b> ANSSNSN                                                                         |
| AcaE            | MNTMSTGAASRPALTRGAVRGAAAILTLFLVAILSQFAPQ <b><u>ASAE</u></b> QNKSV<br>MLRRFFVRSRRELTSSRQPSRQSRRLR                                           |
| AcaF            | SGAAISTFALIAGALGTATLPAPP <b><u>AEA</u></b> VHGNSA<br>MRFSP LIPVNIELKFATASIECRTSPERFAVSKI PAPRALRAPVR                                       |
| AcaG            | ATGALLLLVVMVAAMLT <b><u>VLP</u></b> MQ <b><u>ARA</u></b> AINPKI<br>MFLSSSSPGSPSLRLIRNDMRLRPTRAVR                                           |
| AcaH            | VSAVLCALTLTALSPP <b><u>PLS</u></b> PP <b><u>AGA</u></b> DEPAAP                                                                             |
| AcaI            | MTSHSPFSRRRLPALLGSLPLAATGLIAAAPP <b><u>AL</u></b> AVPTSDG                                                                                  |
| AcaJ            | MRRRAPRLVGLAGAVVLSSSL <b><u>SIP</u></b> MMAP <b><u>VSA</u></b> EPTSGD                                                                      |
| AcaK            | MNIKRVIAAAALTVVPLTASSA <b><u>ALA</u></b> APVAPE                                                                                            |
| AcaL            | MNRPSQHDKPNVAHYMKQ <b><u>LT</u></b> FIILVTL <b><u>LLFN</u></b> QELPLPT <b><u>LPT</u></b> <b><u>ASA</u></b> AITTNV                          |
| AcaM            | MSRTARALSALTA <b><u>FCL</u></b> LAAASTLT <b><u>SVP</u></b> <b><u>AAA</u></b> SGQARP<br>MLVWEGPAALRTAGAQVGADQWCDK <b><u>VDP</u></b> VVSYHTG |
| AcaN            | KNRSSSGLPQEMTRQ <b><u>LDG</u></b> QFTALSLMSAKEILAGM <b><u>ATF</u></b> DERKRS                                                               |
| FimP            | MHSLNTRRGLGLAAAMTLAAGALVAPT <b><u>GAA</u></b> APADPN                                                                                       |
| FimQ            | MSQSSRRPQRGREGLLR <b><u>RFCA</u></b> VVGS <b><u>LAI</u></b> VLVTMVSLPWTAPP <b><u>ADA</u></b> STSDLS                                        |
| FimA            | MKHNASTLGRRAAAAAGVLT <b><u>LAF</u></b> LGLAPS <b><u>AVA</u></b> TETPNY                                                                     |
| FimB            | MFPLLSRRAIKPRLR <b><u>KLVA</u></b> GAAALACVAAALVGTEQPS <b><u>AGA</u></b> APSGLP                                                            |

<sup>a</sup>The n-regions are followed by h-regions, which are highlighted by grey color, and the AXA motif is underlined and bolded.



**Table S4: Edman Degradation of GspA proteins purified from four *A. oris* strains**

| Sequencing Cycle | Residue (pmol) |                |                |                               |
|------------------|----------------|----------------|----------------|-------------------------------|
|                  | MG1            | $\Delta lepB1$ | $\Delta lepB2$ | $\Delta lepB1/\Delta lepB2^a$ |
| 1                | G (4.761)      | G (13.250)     | G (7.833)      | L (3.150); A (3.665)          |
| 2                | D (4.438)      | D (13.830)     | D (8.280)      | A (3.887)                     |
| 3                | S (2.529)      | S (5.692)      | S (4.623)      | G (2.938); P (1.390)          |
| 4                | L (3.972)      | L (10.650)     | L (6.026)      | D (2.962); A (2.836)          |
| 5                | A (4.082)      | A (11.050)     | A (6.184)      | S (1.774)                     |
| 6                | F (2.913)      | F (8.309)      | F (5.394)      | L (3.162)                     |
| 7                | K (3.882)      | K (10.280)     | K (5.761)      | A (4.124); G (2.501)          |
| 8                | I (2.661)      | I (8.125)      | I (4.958)      | F (2.520); D (2.494)          |
| 9                | A (3.427)      | A (9.922)      | A (5.492)      | K (2.520); S (1.729)          |
| 10               | D (2.794)      | D (7.996)      | D (5.265)      | I (1.875); L (2.144)          |

<sup>a</sup> Two major residues were detected in the majority of the first 10 sequencing cycles.

**Table S5: Edman Degradation of FimA proteins purified from three *A. oris* strains**

| Sequencing Cycle | Residue (pmol) |                      |                                    |
|------------------|----------------|----------------------|------------------------------------|
|                  | MG1            | $\Delta lepB1$       | $\Delta lepB2^a$                   |
| 1                | T (8.363)      | T (2.341); G (1.394) | A (10.082); T (8.999); G (70.840); |
| 2                | E (6.034)      | E (1.391)            | V (6.512); E (6.271); L (6.009)    |
| 3                | T (7.885)      | T (2.137)            | A (10.563); T (9.934)              |
| 4                | P (6.338)      | P (1.786)            | T (10.321); P (8.828)              |
| 5                | N (4.784)      | N (1.467)            | E (5.881); N (4.545)               |
| 6                | Y (5.789)      | Y (1.512)            | T (11.027); A (9.149); Y (5.218)   |
| 7                | G (5.246)      | G (2.061)            | P (7.555); G (11.852); V (6.863)   |
| 8                | N (4.597)      | N (1.412)            | N (5.679); A (9.687)               |
| 9                | I (4.777)      | I (1.771)            | I (6.770); Y (4.509)               |
| 10               | K (5.922)      | K (1.133)            | K (6.659); G (12.054); E (5.618)   |

<sup>a</sup> Multiple residues were detected in each of the first 10 sequencing cycles.

## References

1. **Thompson JD, Higgins DG, Gibson TJ.** 1994. CLUSTAL W: improving the sensitivity of progressive multiple sequence alignment through sequence weighting, position-specific gap penalties and weight matrix choice. *Nucleic Acids Res* **22**:4673-4680.
2. **Mishra A, Das A, Cisar JO, Ton-That H.** 2007. Sortase-Catalyzed Assembly of Distinct Heteromeric Fimbriae in *Actinomyces naeslundii*. *J Bacteriol* **189**:3156-3165.
3. **Mishra A, Wu C, Yang J, Cisar JO, Das A, Ton-That H.** 2010. The *Actinomyces oris* type 2 fimbrial shaft FimA mediates co-aggregation with oral streptococci, adherence to red blood cells and biofilm development. *Mol Microbiol* **77** 841–854.
4. **Wu C, Huang IH, Chang C, Reardon-Robinson ME, Das A, Ton-That H.** 2014. Lethality of sortase depletion in *Actinomyces oris* caused by excessive membrane accumulation of a surface glycoprotein. *Mol Microbiol* **94**:1227-1241.
5. **Yoshida Y, Ganguly S, Bush CA, Cisar JO.** 2006. Molecular basis of L-rhamnose branch formation in streptococcal coaggregation receptor polysaccharides. *J Bacteriol* **188**:4125-4130.
6. **Yeung MK, Kozelsky CS.** 1994. Transformation of *Actinomyces* spp. by a gram-negative broad-host-range plasmid. *J Bacteriol* **176**:4173-4176.
7. **Taton A, Unglaub F, Wright NE, Zeng WY, Paz-Yepes J, Brahmsha B, Palenik B, Peterson TC, Haerizadeh F, Golden SS, Golden JW.** 2014. Broad-host-range vector system for synthetic biology and biotechnology in cyanobacteria. *Nucleic Acids Res* **42**:e136.
